# Supplementary material
Source: PubMed Central journal article supplement (PMC545849)

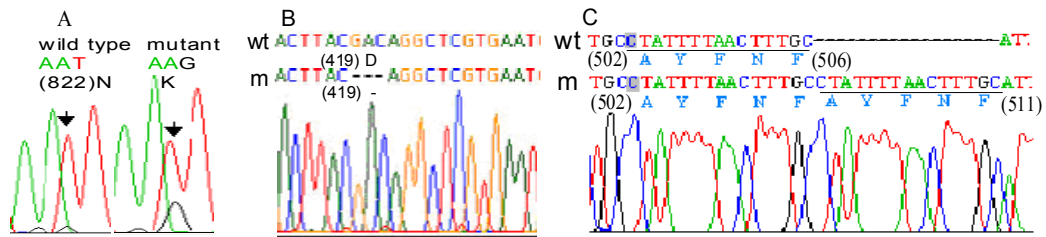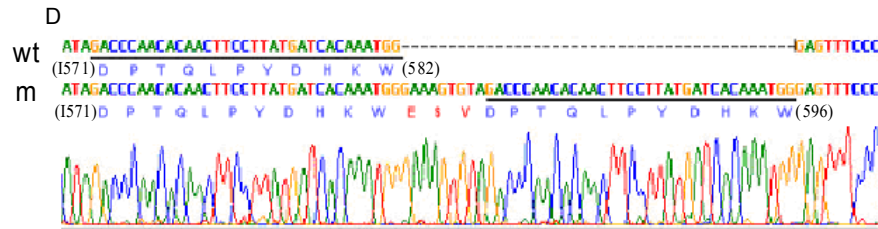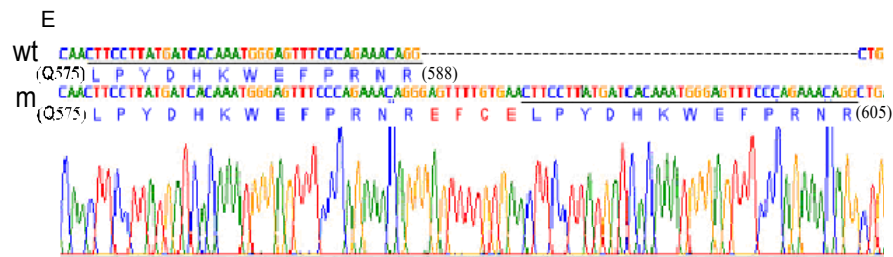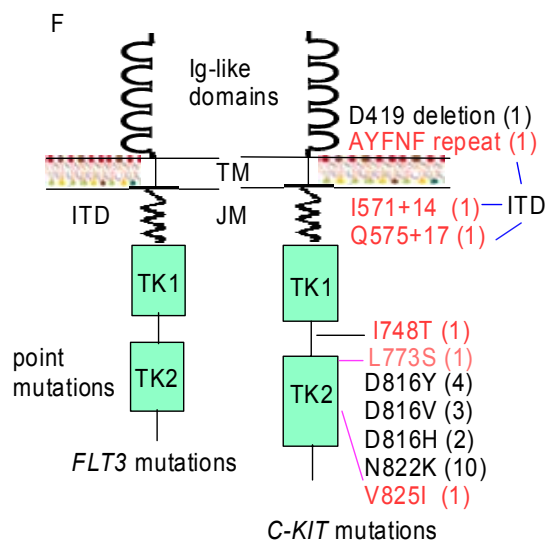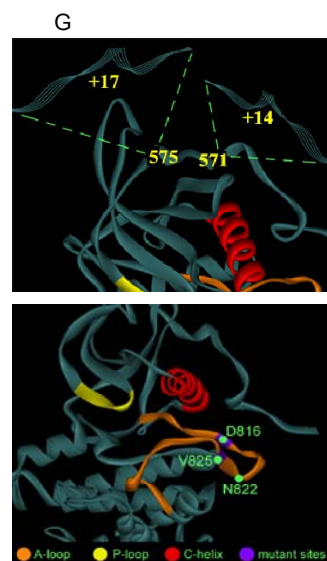

Supplement: pnas_102_4_1104__2.pdf [file pnas_102_4_1104__2.pdf]

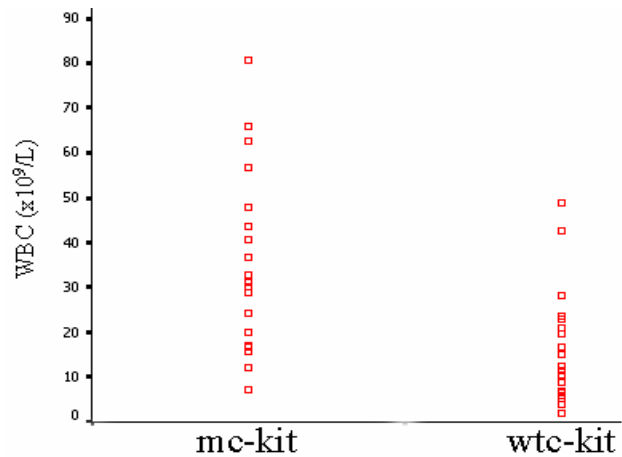

A

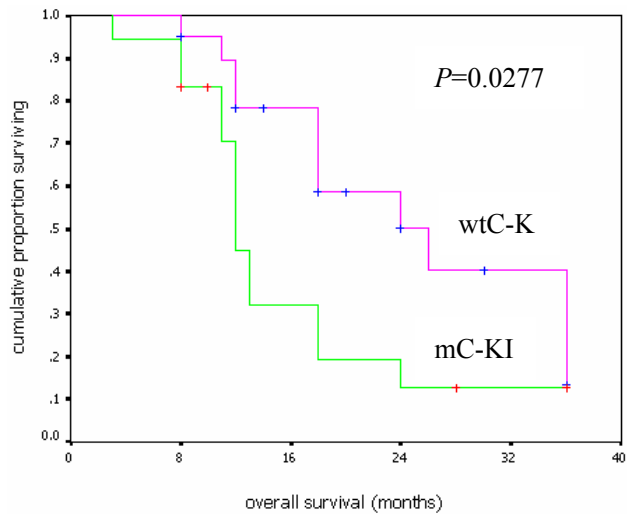

B

Supplement: pnas_102_4_1104__3.pdf [file pnas_102_4_1104__3.pdf]
